# Supplementary material for: In Vitro Antimicrobial Effects and Inactivation Mechanisms of 5,8-Dihydroxy-1,4-Napthoquinone
Source: MDPI journal article supplement (doi:10.3390/antibiotics11111537), 2022-11-03
Supplement: s1 [file s1]

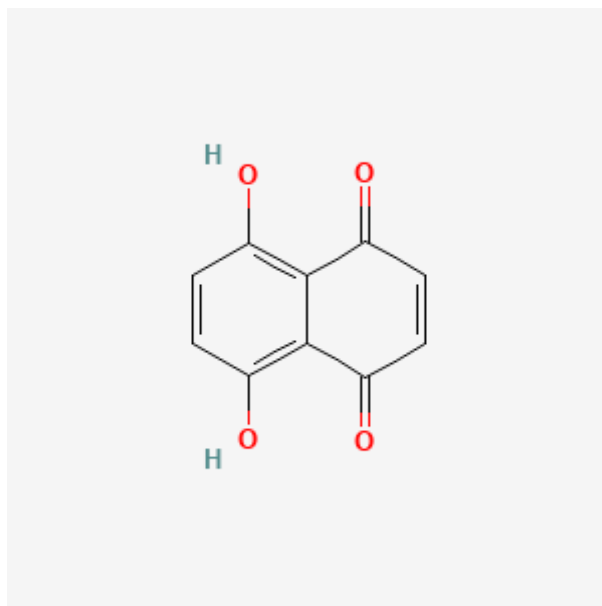

Figure S1. Structure of 5,8-dihydroxy-1,4-NQ (Naphthazarin).

([https://pubchem.ncbi.nlm.nih.gov/compound/5\\_8-Dihydroxy-1\\_4-naphthoquinone#section=Structures](https://pubchem.ncbi.nlm.nih.gov/compound/5_8-Dihydroxy-1_4-naphthoquinone#section=Structures)).
